# Supplementary material for: Ribbon boosts ribosomal protein gene expression to coordinate organ form and function
Source: PubMed Central journal article supplement — J Cell Biol. 2022 Feb 23;221(4):e202110073. doi: 10.1083/jcb.202110073 (PMC9237840; doi:10.1083/jcb.202110073), 2022-02-23

Ub-Gal4 > UAS-gfp  
 Ub-Gal4 > UAS-gfp  
 Ub-Gal4 > UAS-crebA-gfp  
 Ub-Gal4 > UAS-crebA-gfp  
 Ub-Gal4 > UAS-rib  
 Ub-Gal4 > UAS-rib  
 Ub-Gal4 > UAS-rib-gfp  
 Ub-Gal4 > UAS-rib-gfp

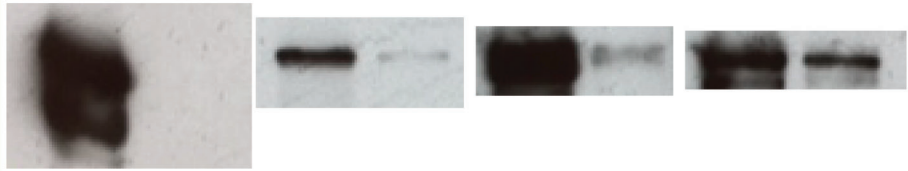

anti-GFP      anti-CrebA      anti-Rib

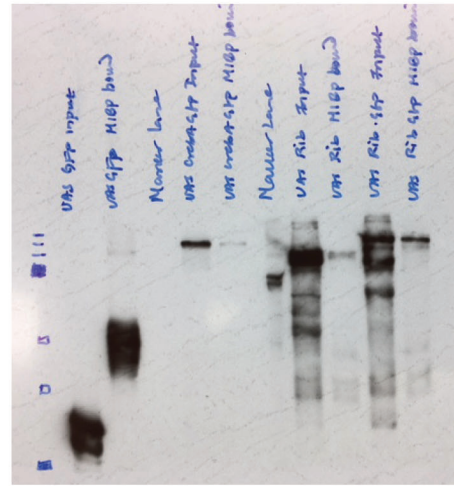

Ub-Gal4 > UAS-gfp  
 Ub-Gal4 > UAS-gfp  
 Ub-Gal4 > UAS-crebA-gfp  
 Ub-Gal4 > UAS-crebA-gfp  
 Ub-Gal4 > UAS-rib  
 Ub-Gal4 > UAS-rib  
 Ub-Gal4 > UAS-rib-gfp  
 Ub-Gal4 > UAS-rib-gfp

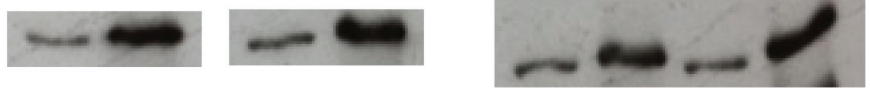

anti-M1BP

Input   
  M1BP-bound fraction

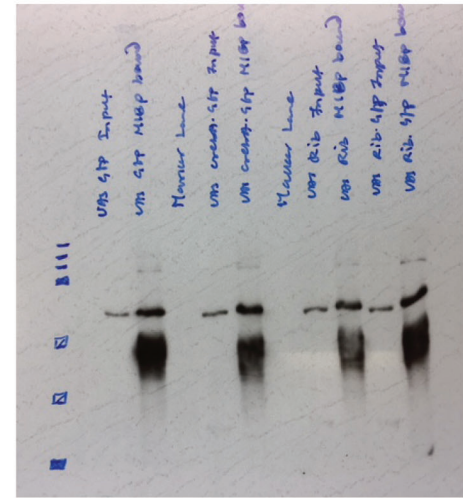

Ub-Gal4 > UAS-gfp  
 Ub-Gal4 > UAS-gfp  
 Ub-Gal4 > UAS-crebA-gfp  
 Ub-Gal4 > UAS-crebA-gfp  
 Ub-Gal4 > UAS-rib  
 Ub-Gal4 > UAS-rib  
 Ub-Gal4 > UAS-rib-gfp  
 Ub-Gal4 > UAS-rib-gfp

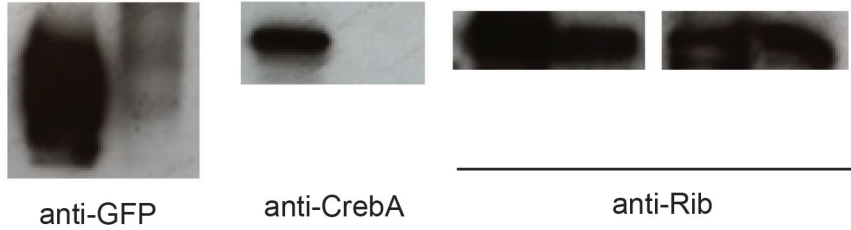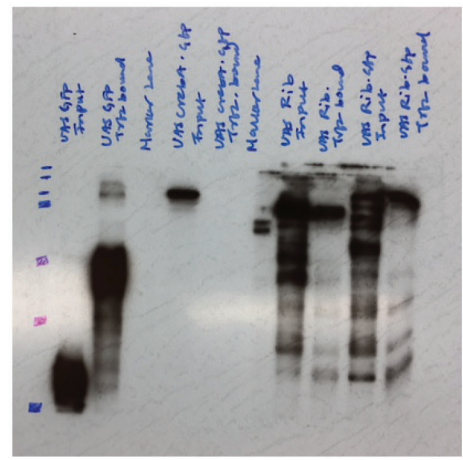

Ub-Gal4 > UAS-gfp  
 Ub-Gal4 > UAS-gfp  
 Ub-Gal4 > UAS-crebA-gfp  
 Ub-Gal4 > UAS-crebA-gfp  
 Ub-Gal4 > UAS-rib  
 Ub-Gal4 > UAS-rib  
 Ub-Gal4 > UAS-rib-gfp  
 Ub-Gal4 > UAS-rib-gfp

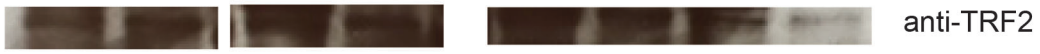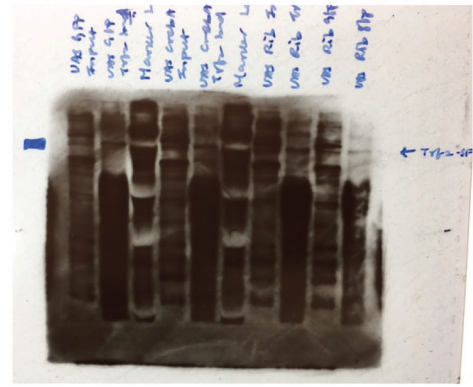

Input
  TRF2-bound fraction

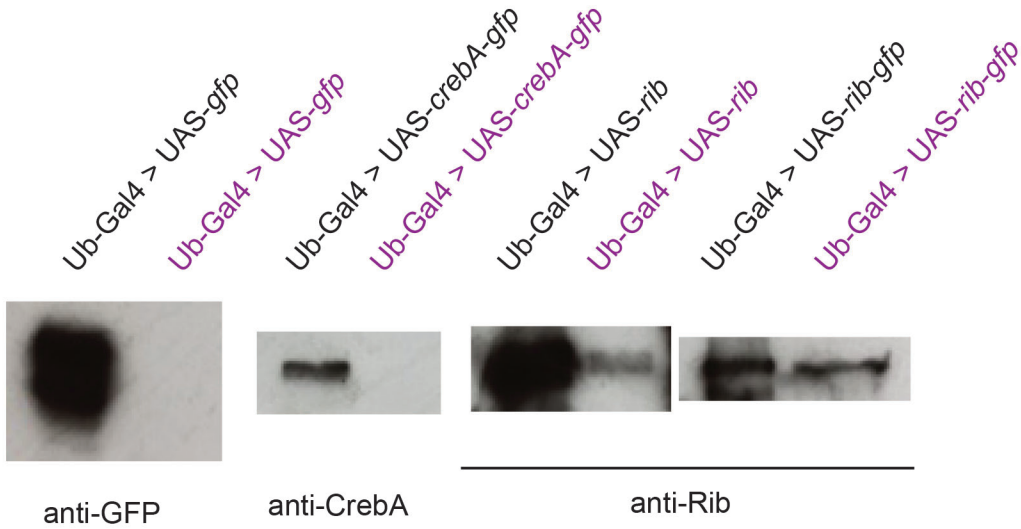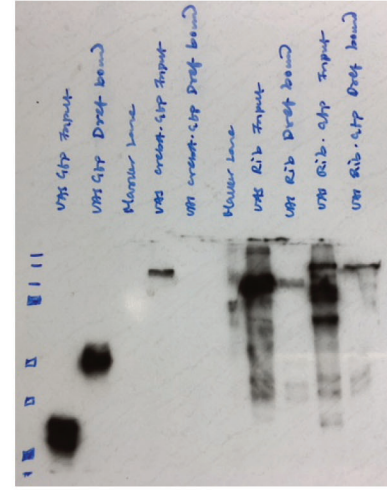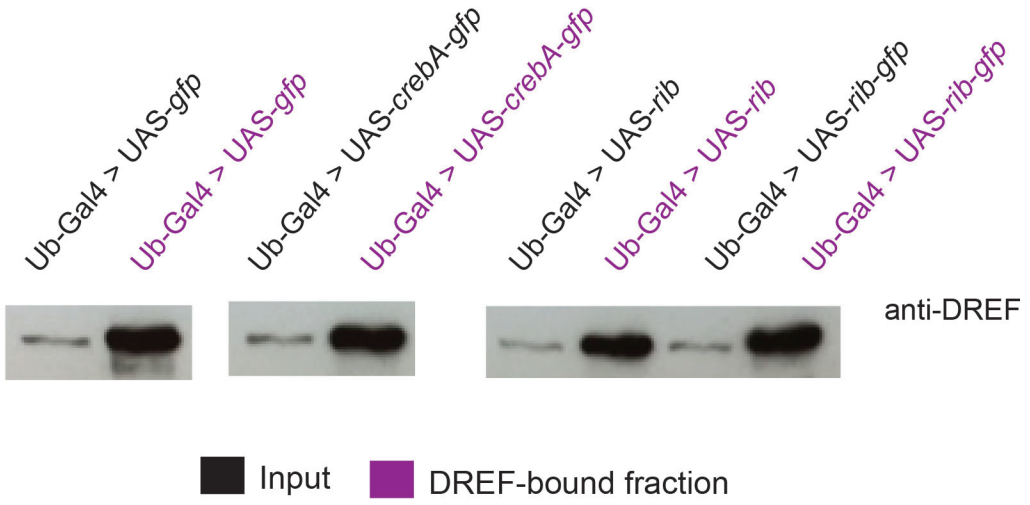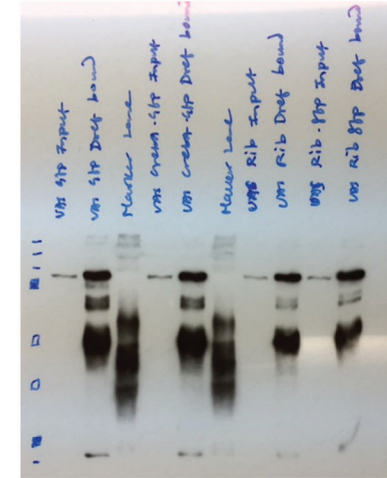

Supplement: JCB_202110073_SourceDataF7.pdf [file JCB_202110073_SourceDataF7.pdf]
