# Supplementary material for: Ribbon boosts ribosomal protein gene expression to coordinate organ form and function
Source: PubMed Central journal article supplement — J Cell Biol. 2022 Feb 23;221(4):e202110073. doi: 10.1083/jcb.202110073 (PMC9237840; doi:10.1083/jcb.202110073), 2022-02-23

S17

- S17 oli<sub>14</sub> only
- S17 oli<sub>14</sub> + FL R1b 1x
- S17 oli<sub>14</sub> + FL R1b 2x
- S17 oli<sub>14</sub> + FL R1b 3x
- S17 oli<sub>14</sub> + R1bP19 1x
- S17 oli<sub>14</sub> + R1bP19 2x
- S17 oli<sub>14</sub> + R1bP19 3x
- S17 oli<sub>14</sub> + 45T 1x
- S17 oli<sub>14</sub> + 45T 2x
- S17 oli<sub>14</sub> + 45T 3x

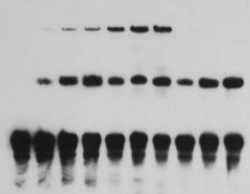

S17 mut

- S17 mut oli<sub>14</sub> only
- S17 mut + FL R1b 1x
- S17 mut + FL R1b 2x
- S17 mut + FL R1b 3x
- S17 mut + R1bP19 1x
- S17 mut + R1bP19 2x
- S17 mut + R1bP19 3x
- S17 mut + 45T 1x
- S17 mut + 45T 2x
- S17 mut + 45T 3x

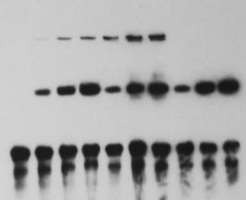

3/13/20  
0/2

Rib binding to *crsA* enhancer

P24-1 oligo only

P24-1 + *crsA*A

P24-1 + Ribofl Bx

P24-1 + Ribofl Bx

P24-1 + GST Bx

T5m2 oligo only

T5m2 + *crsA*A

T5m2 + Ribofl Bx

T5m2 + Ribofl Bx

T5m2 + GST Bx

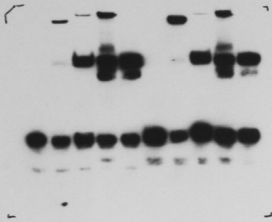

Supplement: JCB_202110073_SourceDataF6.pdf [file JCB_202110073_SourceDataF6.pdf]
