# Supplementary material for: Ribbon boosts ribosomal protein gene expression to coordinate organ form and function
Source: PubMed Central journal article supplement — J Cell Biol. 2022 Feb 23;221(4):e202110073. doi: 10.1083/jcb.202110073 (PMC9237840; doi:10.1083/jcb.202110073), 2022-02-23
Supplement: JCB_202110073_SourceDataFS5.pdf [file JCB_202110073_SourceDataFS5.pdf]

L6 olive study

L6 + FL Ribo 1X  
L6 + FL Ribo 2X  
L6 + FL Ribo 3X  
L6 + Ribo 1X  
L6 + Ribo 2X  
L6 + Ribo 3X  
L6 + 95T 1X  
L6 + 95T 2X  
L6 + 95T 3X

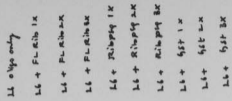

L6

L7 olive study

L7 + FL Ribo 1X  
L7 + FL Ribo 2X  
L7 + FL Ribo 3X  
L7 + Ribo 1X  
L7 + Ribo 2X  
L7 + Ribo 3X  
L7 + 95T 1X  
L7 + 95T 2X  
L7 + 95T 3X

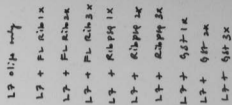

L7

2/7/20  
5/3

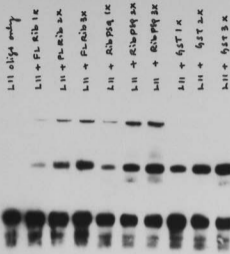

L11

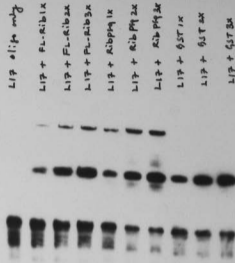

L17

3/11/2020  
02

L19 oligo only

- L19 + PL R1b 1X
- L19 + PL R1b 2X
- L19 + PL R1b 3X
- L19 + R1b p19 1X
- L19 + R1b p19 2X
- L19 + R1b p19 3X
- L19 + 95T 1X
- L19 + 95T 2X
- L19 + 95T 3X

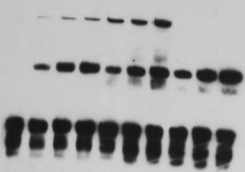

L19

S3 oligo only

- S3 + PL R1b 1X
- S3 + PL R1b 2X
- S3 + PL R1b 3X
- S3 + R1b p19 1X
- S3 + R1b p19 2X
- S3 + R1b p19 3X
- S3 + 95T 1X
- S3 + 95T 2X
- S3 + 95T 3X

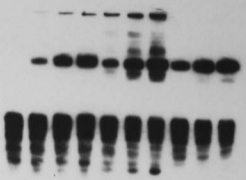

S3

3/16/20  
wind.

S10b a1ga only

S10b + R1bPL 1X

S10b + R1bPL 2X

S10b + R1bPL 3X

S10b + R1bPL 1X

S10b + R1bPL 2X

S10b + R1bPL 3X

S10b + G5t 1X

S10b + G5t 2X

S10b + G5t 3X

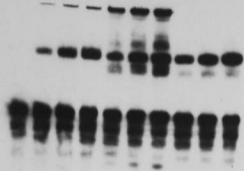

S10b

S16a1ga only

S16 + R1bPL 2X

S16 + R1bPL 1X

S16 + R1b PL 3X

S16 + R1bPL 1X

S16 + R1bPL 2X

S16 + G5t 1X

S16 + G5t 2X

S16 + G5t 3X

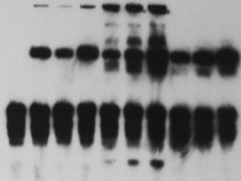

S16

3/17/20  
sm

S18 oils only

S18 + RibPL 1X

S18 + RibPL 2X

S18 + RibPL 3X

S18 + RibPL 4X

S18 + RibPL 5X

S18 + RibPL 6X

S18 + RibPL 7X

S18 + RibPL 8X

S18 + RibPL 9X

S18

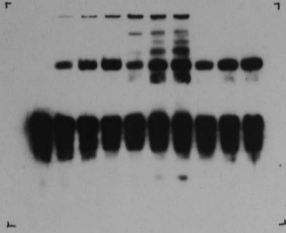

S27 oils only

S27A + RibPL 1X

S27A + RibPL 2X

S27A + RibPL 3X

S27A + RibPL 4X

S27A + RibPL 5X

S27A + RibPL 6X

S27A + RibPL 7X

S27A + RibPL 8X

S27A + RibPL 9X

S27A

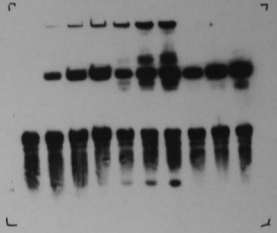

2/12/20  
oz
